# Supplementary material for: Beverages Based on Second Quality Citrus Fruits and Maqui Berry, a Source of Bioactive (Poly)phenols: Sorting Out Urine Metabolites upon a Longitudinal Study
Source: PubMed Central journal article supplement (PMC7910882; doi:10.3390/nu13020312), 2021-01-22
Supplement: nutrients-13-00312-s001.pdf [file nutrients-13-00312-s001.pdf]

**Table S1.** Proximate composition of the beverages developed using different sweeteners (sucrose, sucralose, and stevia).

| Parameter                       | Sweetener |           |        |
|---------------------------------|-----------|-----------|--------|
|                                 | Sucrose   | Sucralose | Stevia |
| Energy (kj/100 mL)              | 314       | 123       | 134    |
| Energy (kcal/100mL)             | 74        | 29        | 32     |
| Total fat (g/100 mL)            | 0.14      | 0.22      | 0.30   |
| Monounsaturated fats (g/100 mL) | 0.06      | 0.10      | 0.10   |
| Polyunsaturated fats (g/100 mL) | 0.06      | 0.04      | 0.17   |
| Saturated fats (g/100 mL)       | 0.02      | 0.07      | 0.03   |
| Carbohydrates (g/100 mL)        | 17.40     | 6.00      | 6.10   |
| Total sugar (g/100 mL)          | 16.90     | 5.70      | 6.10   |
| Fructose (g/100 mL)             | 2.90      | 1.90      | 2.10   |
| Glucose (g/100 mL)              | 2.90      | 1.80      | 2.00   |
| Lactose (g/100 mL)              | <0.40     | <0.40     | <0.40  |
| Maltose (g/100 mL)              | <0.40     | <0.40     | <0.40  |
| Sucralose (g/100 mL)            | 11.10     | 2.00      | 2.00   |
| Dietary fiber (g/100 mL)        | 0.36      | 0.60      | 1.00   |
| Ashes (g/100 mL)                | 0.23      | 0.23      | 0.26   |
| Moisture (g/100 mL)             | 81.30     | 92.50     | 91.7   |
| Proteins (g/100 mL)             | 0.57      | 0.50      | 0.66   |
| Salts (g/100 mL)                | <0.01     | <0.01     | <0.01  |
| Sodium (mg/100 mL)              | 3.10      | 2.80      | 2.50   |

**Table S2.** Qualitative analysis of anthocyanin and flavanone metabolites in plasma after the ingestion of maqui-citrus juices determined by UHLC-ESI-QqQ-MS/MS operated in multiple reaction monitoring, in negative and positive ionization modes, respectively.

| Compound                           | RT (min)    | Precursor ion [M-H] <sup>-</sup> m/z | Product ion MS2 [M-H] <sup>-</sup> m/z | Fragmentation (V) | CE (eV) | Polarity |
|------------------------------------|-------------|--------------------------------------|----------------------------------------|-------------------|---------|----------|
| <i>Cyanidin metabolites</i>        |             |                                      |                                        |                   |         |          |
| Cyanidin (Cy)                      | 8.81 (N.f.) | 287.0                                | 137.0                                  | 100               | 20      | Positive |
| Cy 3-O-glucoside                   | N.f.        | 449.0                                | 287.0                                  | 100               | 20      | Positive |
| Cy 3,5-O-di-glucoside              | N.f.        | 743.0                                | 287.0                                  | 100               | 20      | Positive |
| Cy 3-O-sambubioside                | N.f.        | 581.0                                | 287.0                                  | 100               | 20      | Positive |
| Cy 3-O-sambubioside-5-O-glucoside  | N.f.        | 611.0                                | 287.0                                  | 100               | 20      | Positive |
| <i>Delphinidin metabolites</i>     |             |                                      |                                        |                   |         |          |
| Delphinidin (Dp)                   | 5.18 (N.f.) | 303.0                                | 229.0/257.0                            | 100               | 20      | Positive |
| Dp 3-O-glucoside                   | N.f.        | 465.0                                | 303.0                                  | 100               | 20      | Positive |
| Dp 3,5-O-di-glucoside              | N.f.        | 627.0                                | 303.0                                  | 100               | 20      | Positive |
| Dp 3-O-sambubioside                | N.f.        | 597.0                                | 303.0                                  | 100               | 20      | Positive |
| Dp 3-O-sambubioside-5-O-glucoside  | N.f.        | 759.0                                | 303.0                                  | 100               | 20      | Positive |
| <i>Eriodictyol metabolites</i>     |             |                                      |                                        |                   |         |          |
| Eriodictyol (E)                    | 6.49        | 287.0                                | 151.0                                  | 70                | 10      | Negative |
| Eriocitrin                         | N.f.        | 449.0                                | 287.0                                  | 70                | 10      | Negative |
| E glucuronide                      | 4.87        | 463.0                                | 287.0                                  | 70                | 10      | Negative |
| E di-glucuronide                   | N.f.        | 639.0                                | 287.0                                  | 70                | 10      | Negative |
| E sulfate                          | 5.53        | 367.0                                | 287.0                                  | 70                | 10      | Negative |
| E di-sulfate                       | N.f.        | 447.0                                | 287.0                                  | 70                | 10      | Negative |
| E glucuronide-sulfate              | N.f.        | 543.0                                | 287.0                                  | 70                | 10      | Negative |
| <i>Hesperetin metabolites</i>      |             |                                      |                                        |                   |         |          |
| Hesperetin (H)                     | 7.30 (N.f.) | 302.0                                | 151.0                                  | 70                | 20      | Negative |
| Hesperidin                         | N.f.        | 609.0                                | 302.0                                  | 70                | 20      | Negative |
| H glucuronide                      | N.f.        | 478.0                                | 302.0                                  | 70                | 20      | Negative |
| H di-glucuronide                   | N.f.        | 664.0                                | 302.0                                  | 70                | 20      | Negative |
| H sulfate                          | N.f.        | 382.0                                | 302.0                                  | 70                | 20      | Negative |
| H di-sulfate                       | N.f.        | 462.0                                | 302.0                                  | 70                | 20      | Negative |
| H glucuronide-sulfate              | N.f.        | 558.0                                | 302.0                                  | 70                | 20      | Negative |
| <i>Homoeriodictyol metabolites</i> |             |                                      |                                        |                   |         |          |
| Homoeriodictyol (HE)               | 7.30 (N.f.) | 301.0                                | 151.0                                  | 110               | 15      | Negative |
| HE glucuronide                     | 5.50        | 477.0                                | 301.0                                  | 110               | 15      | Negative |
| HE di-glucuronide                  | N.f.        | 653.0                                | 301.0                                  | 110               | 15      | Negative |
| HE sulfate                         | N.f.        | 381.0                                | 301.0                                  | 110               | 15      | Negative |
| HE di-sulfate                      | N.f.        | 461.0                                | 301.0                                  | 110               | 15      | Negative |
| HE glucuronide-sulfate             | 4.67        | 557.0                                | 301.0                                  | 110               | 15      | Negative |
| <i>Naringenin metabolites</i>      |             |                                      |                                        |                   |         |          |
| Naringenin (N)                     | 7.26        | 271.0                                | 119.0                                  | 130               | 20      | Negative |
| O-triglycosyl-N                    | 4.63        | 433.0                                | 271.0                                  | 130               | 20      | Negative |
| Narirutin                          | N.f.        | 579.0                                | 271.0                                  | 130               | 20      | Negative |
| N glucuronide                      | 5.07        | 433.0                                | 271.0                                  | 130               | 20      | Negative |
| N di-glucuronide                   | N.f.        | 623.0                                | 271.0                                  | 130               | 20      | Negative |
| N sulfate                          | N.f.        | 351.0                                | 271.0                                  | 130               | 20      | Negative |
| N di-sulfate                       | N.f.        | 431.0                                | 271.0                                  | 130               | 20      | Negative |
| N glucuronide-sulfate              | N.f.        | 527.0                                | 271.0                                  | 130               | 20      | Negative |
| <i>Caffeic acid metabolites</i>    |             |                                      |                                        |                   |         |          |
| Caffeic acid (CA)                  | 3.25 (N.f.) | 179.1                                | 135.0                                  | 70                | 15      | Negative |
| CA glucuronide                     | 2.40        | 355.1                                | 179.1                                  | 70                | 15      | Negative |
| CA di-glucuronide                  | 1.67        | 531.1                                | 179.1                                  | 70                | 15      | Negative |
| CA sulfate                         | 2.99        | 259.1                                | 179.1                                  | 70                | 15      | Negative |
| CA glucuronide-sulfate             | 1.95        | 435.1                                | 179.1                                  | 70                | 15      | Negative |
| CA di-Sulfate                      | N.f.        | 339.1                                | 179.1                                  | 70                | 15      | Negative |

|                                                   |             |       |       |     |    |          |
|---------------------------------------------------|-------------|-------|-------|-----|----|----------|
| <i>Catechol metabolites</i>                       |             |       |       |     |    |          |
| Catechol (CAT)                                    | 5.04 (N.f.) | 109.0 | 67.0  | 80  | 6  | Negative |
| CAT glucuronide                                   | N.f.        | 286.0 | 109.0 | 80  | 6  | Negative |
| CAT di glucuronide                                | 2.83 (N.f.) | 461.0 | 109.0 | 80  | 6  | Negative |
| CAT sulfate                                       | 1.59 (N.f.) | 189.0 | 109.0 | 80  | 6  | Negative |
| CAT glucuronide-sulfate                           | 1.38 (N.f.) | 365.0 | 109.0 | 80  | 6  | Negative |
| CAT di-sulfate                                    | N.f.        | 269.0 | 109.0 | 80  | 6  | Negative |
| <i>3,4-Dihydroxyphenylacetic acid metabolites</i> |             |       |       |     |    |          |
| 3,4-Dihydroxyphenylacetic acid (DHPAA)            | 1.80        | 166.8 | 123.2 | 70  | 5  | Negative |
| DHPAA glucuronide                                 | 1.58        | 342.8 | 166.8 | 70  | 5  | Negative |
| DHPAA di-glucuronide                              | 1.04        | 518.8 | 166.8 | 70  | 5  | Negative |
| DHPAA sulfate                                     | 1.14        | 246.8 | 166.8 | 70  | 5  | Negative |
| DHPAA glucuronide-sulfate                         | 0.74        | 422.8 | 166.8 | 70  | 5  | Negative |
| DHPAA di-sulfate                                  | 1.07        | 326.8 | 166.8 | 70  | 5  | Negative |
| <i>Hippuric acid metabolites</i>                  |             |       |       |     |    |          |
| Hippuric acid (HA)                                | 2.55        | 178.0 | 134.4 | 80  | 5  | Negative |
| HA glucuronide                                    | 1.70 (N.f.) | 354.0 | 178.0 | 80  | 5  | Negative |
| HA di-glucuronide                                 | 0.59 (N.f.) | 530.0 | 178.0 | 80  | 5  | Negative |
| HA sulfate                                        | 1.78        | 258.0 | 178.0 | 80  | 5  | Negative |
| HA glucuronide-sulfate                            | 1.50        | 434.0 | 178.0 | 80  | 5  | Negative |
| HA di-sulfate                                     | N.f.        | 338.0 | 178.0 | 80  | 5  | Negative |
| <i>Gallic acid metabolites</i>                    |             |       |       |     |    |          |
| Gallic acid (GA)                                  | 0.71 (N.f.) | 169.0 | 125.0 | 70  | 10 | Negative |
| GA glucuronide                                    | N.f.        | 345.0 | 169.0 | 70  | 10 | Negative |
| GA di-glucuronide                                 | N.f.        | 521.0 | 169.0 | 70  | 10 | Negative |
| GA sulfate                                        | N.f.        | 249.0 | 169.0 | 70  | 10 | Negative |
| GA glucuronide-sulfate                            | N.f.        | 425.0 | 169.0 | 70  | 10 | Negative |
| GA di-sulfate                                     | N.f.        | 329.0 | 169.0 | 70  | 10 | Negative |
| <i>Trans-ferulic acid metabolites</i>             |             |       |       |     |    |          |
| Trans-ferulic acid (TFA)                          | 4.46        | 192.8 | 133.8 | 20  | 5  | Negative |
| TFA glucuronide                                   | 4.25        | 368.8 | 192.8 | 20  | 5  | Negative |
| TFA di-glucuronide                                | 1.74 (N.f.) | 544.8 | 192.8 | 20  | 5  | Negative |
| TFA sulfate                                       | 3.56 (N.f.) | 272.8 | 192.8 | 20  | 5  | Negative |
| TFA glucuronide-sulfate                           | N.f.        | 448.8 | 192.8 | 20  | 5  | Negative |
| TFA di-sulfate                                    | 1.32        | 352.8 | 192.8 | 20  | 5  | Negative |
| <i>2,4,6-Trihydrobenzaldehyd metabolites</i>      |             |       |       |     |    |          |
| 2,4,6-Trihydrobenzaldehyd (THBA)                  | 5.10        | 153.1 | 106.8 | 90  | 18 | Negative |
| THBA glucuronide                                  | 5.08 (N.f.) | 329.1 | 153.1 | 90  | 18 | Negative |
| THBA di-glucuronide                               | N.f.        | 505.1 | 153.1 | 90  | 18 | Negative |
| THBA sulfate                                      | 1.46        | 233.1 | 153.1 | 90  | 18 | Negative |
| THBA glucuronide-sulfate                          | N.f.        | 409.1 | 153.1 | 90  | 18 | Negative |
| THBA di-sulfate                                   | N.f.        | 313.1 | 153.1 | 90  | 18 | Negative |
| <i>Trans-isoferulic acid metabolites</i>          |             |       |       |     |    |          |
| Trans-isoferulic acid (TIFA)                      | 1.46        | 193.7 | 134.7 | 70  | 5  | Negative |
| TIFA glucuronide                                  | N.f.        | 366.7 | 193.7 | 70  | 5  | Negative |
| TIFA di-glucuronide                               | N.f.        | 545.7 | 193.7 | 70  | 5  | Negative |
| TIFA sulfate                                      | 1.45 (N.f.) | 273.7 | 193.7 | 70  | 5  | Negative |
| TIFA glucuronide-sulfate                          | N.f.        | 449.7 | 193.7 | 70  | 5  | Negative |
| TIFA di-sulfate                                   | N.f.        | 353.7 | 193.7 | 70  | 5  | Negative |
| <i>Vanillic acid metabolites</i>                  |             |       |       |     |    |          |
| Vanillic acid (VA)                                | 3.18        | 167.0 | 151.8 | 100 | 15 | Negative |
| VA glucuronide                                    | 1.57 (N.f.) | 343.0 | 167.0 | 100 | 15 | Negative |
| VA di-glucuronide                                 | 1.01        | 519.0 | 167.0 | 100 | 15 | Negative |
| VA sulfate                                        | 1.14        | 247.0 | 167.0 | 100 | 15 | Negative |
| VA glucuronide-sulfate                            | 0.93        | 423.0 | 167.0 | 100 | 15 | Negative |
| VA di-sulfate                                     | 1.13 (N.f.) | 327.0 | 167.0 | 100 | 15 | Negative |

N.f., not found
